# Supplementary material for: Fabrication of closed-cell inverse opal photonic crystal pigments with angle-independent and stable structural colors
Source: Royal Society of Chemistry journal article supplement (doi:10.1039/d4qm00608a), 2024-01-01
Supplement: d4qm00608a1.pdf [file d4qm00608a1.pdf]

## Supporting Information

### Fabrication of closed-cell inverse opal photonic crystal pigments with angle-independent and stable structural colors

Qianyao Fang<sup>#</sup>, Shijia Wang<sup>#</sup>, Jiahao Li and Xin Su<sup>\*</sup>

*School of Material Science and Chemical Engineering, Ningbo University, Ningbo, Zhejiang, 315211, China.*

**Table S1.** Recipes for preparing monodisperse PS spheres with various diameters

| Sample | SDS (mg) | Size (nm) | PDI   | Zeta potential (mV) |
|--------|----------|-----------|-------|---------------------|
| (a)    | 45       | 305       | 0.045 | - 62.6              |
| (b)    | 60       | 260       | 0.057 | - 65.8              |
| (c)    | 75       | 230       | 0.033 | - 64.8              |
| (d)    | 90       | 220       | 0.046 | - 64.1              |
| (e)    | 100      | 205       | 0.042 | - 59.7              |
| (f)    | 110      | 185       | 0.038 | - 63.8              |
| (g)    | 120      | 170       | 0.031 | - 66.4              |

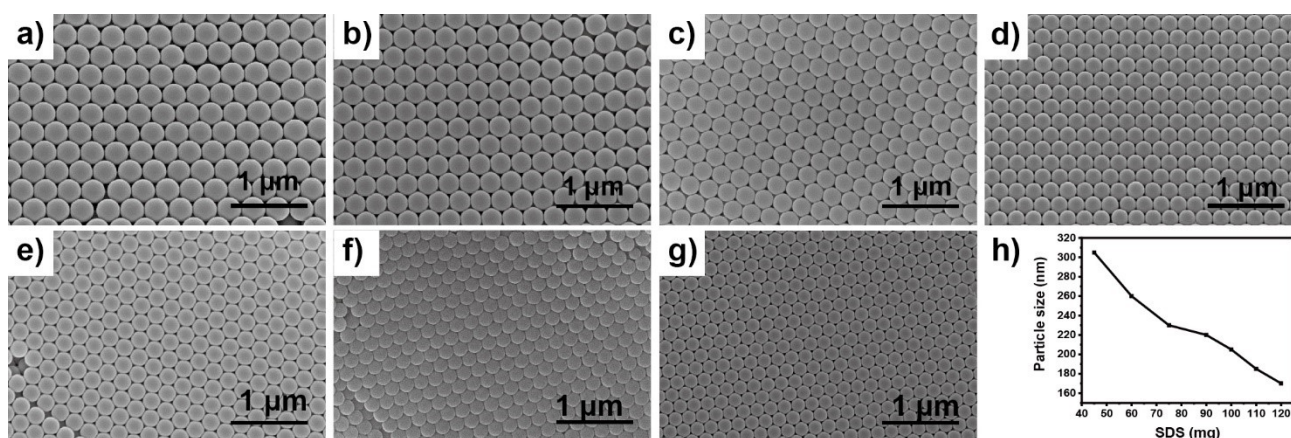

**Figure S1.** SEM images of monodisperse PS spheres with different diameters: (a) 305 nm; (b) 260 nm; (c) 230 nm; (d) 220 nm; (e) 205 nm; (f) 185 nm; (g) 170 nm; (h) plot showing the relationship between sphere diameter of PS spheres and the amount of emulsifier

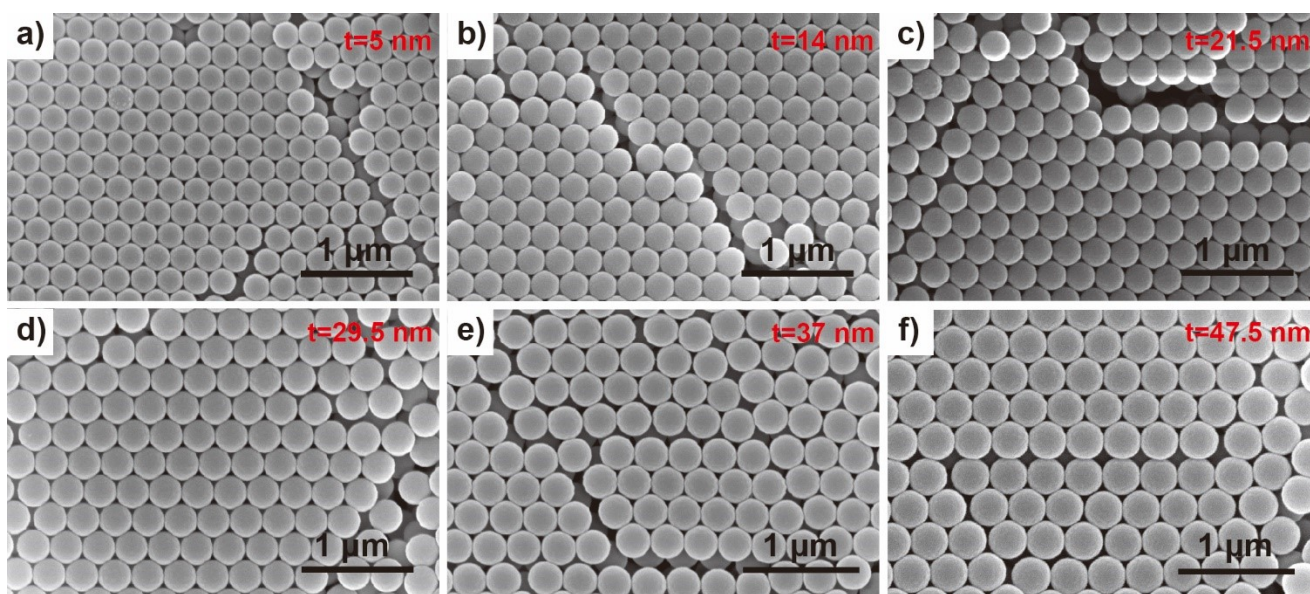

**Figure S2.** SEM images PS@SiO<sub>2</sub> core-shell spheres with 220 nm PS spheres as cores and various shell thickness: (a) 230 nm spheres with 5 nm shell; (b) 248 nm spheres with 14 nm shell; (c) 263 nm spheres with 21.5 nm shell; (d) 279 nm spheres with 29.5 nm shell; (e) 294 nm spheres with 37 nm shell; (f) 315 nm spheres with 47.5 nm shell;

**Table S2.** Recipes for preparing PS@SiO<sub>2</sub> spheres with various diameters and shell thickness

| Sample | VTMS (mL) | Size (nm) | Shell thickness (nm) |
|--------|-----------|-----------|----------------------|
| (a)    | 1         | 230       | 5                    |
| (b)    | 2         | 248       | 14                   |
| (c)    | 3         | 263       | 21.5                 |
| (d)    | 4         | 279       | 29.5                 |
| (e)    | 5         | 294       | 37                   |
| (f)    | 6         | 315       | 47.5                 |

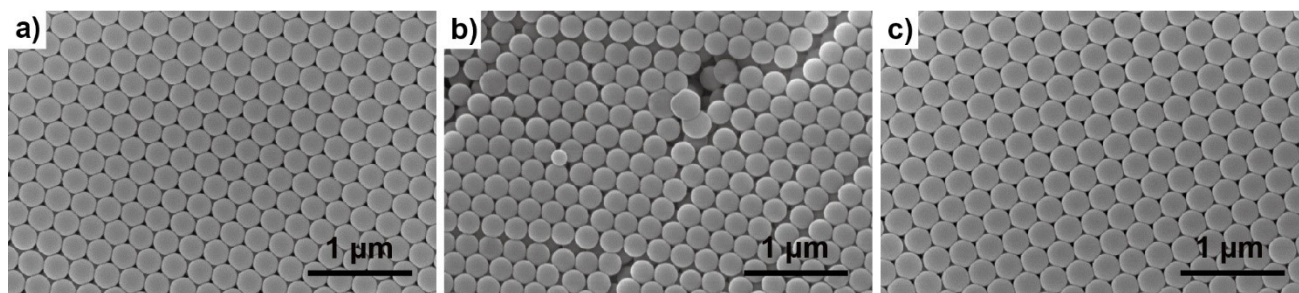

**Figure S3.** SEM images of (a) 220 nm PS spheres as cores; products of sol-gel reaction with various precursors: (b) TEOS; (c) VTMS

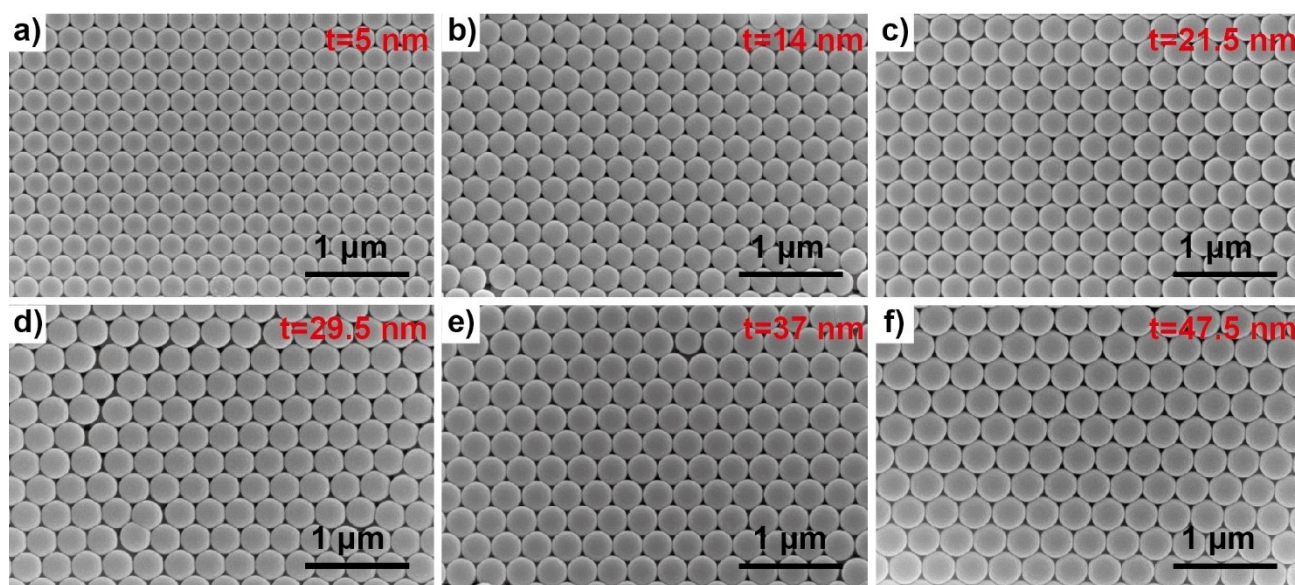

**Figure S4.** SEM images of PCs fabricated with PS@SiO<sub>2</sub> spheres bearing identical 220 nm PS spheres as cores and various shell thickness: (a) 230 nm spheres with 5 nm shell; (b) 248 nm spheres with 14 nm shell; (c) 263 nm spheres with 21.5 nm shell; (d) 279 nm spheres with 29.5 nm shell; (e) 294 nm spheres with 37 nm shell; (f) 315 nm spheres with 47.5 nm shell;

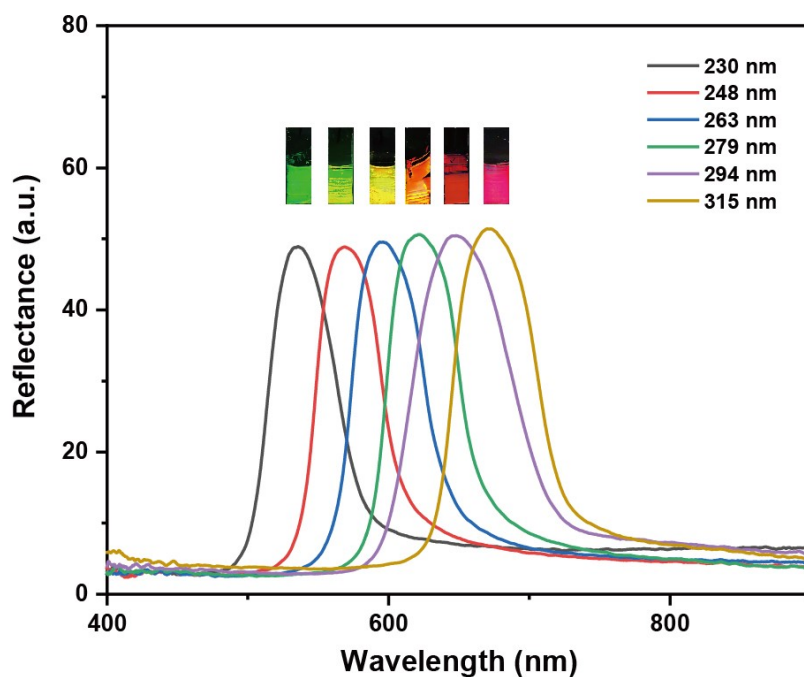

**Figure S5.** Reflectance spectra of PC films fabricated using PS@SiO<sub>2</sub> core-shell spheres with various shell thickness as building blocks

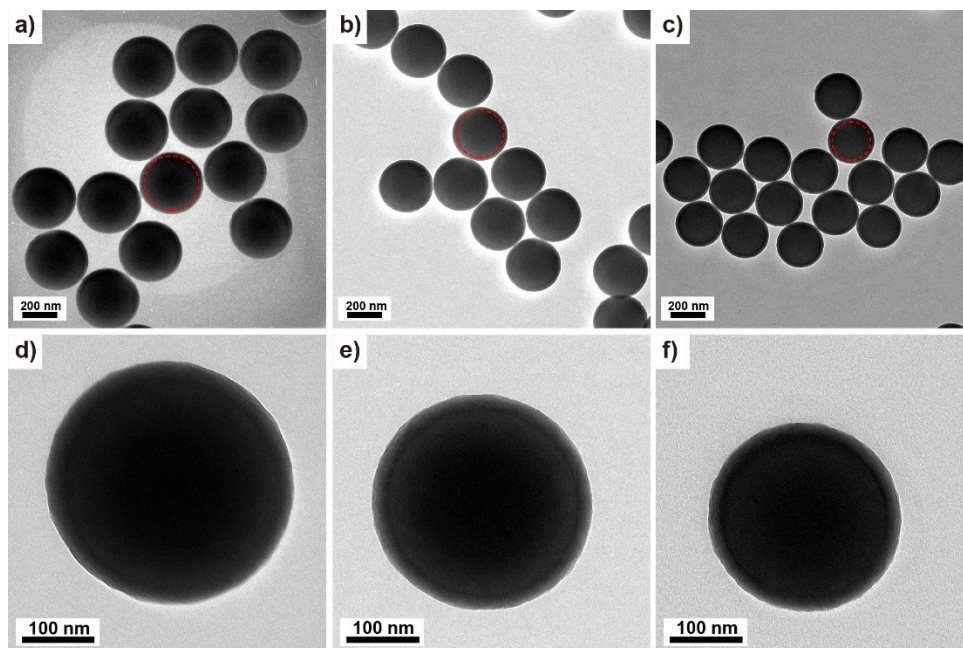

**Figure S6.** TEM images of PS@SiO<sub>2</sub> spheres with various diameters and nearly identical 23 nm shell thickness: (a,d) 352 nm; (b,e) 305 nm; (c,f) 268 nm; (d-f) are TEM images with higher magnification times of samples a, b and c, respectively.

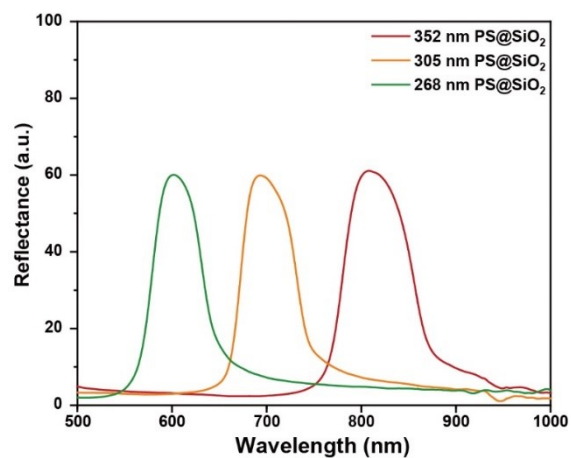

**Figure S7.** Reflectance spectra of opal PC templates fabricated using PS@SiO<sub>2</sub> spheres with different diameters

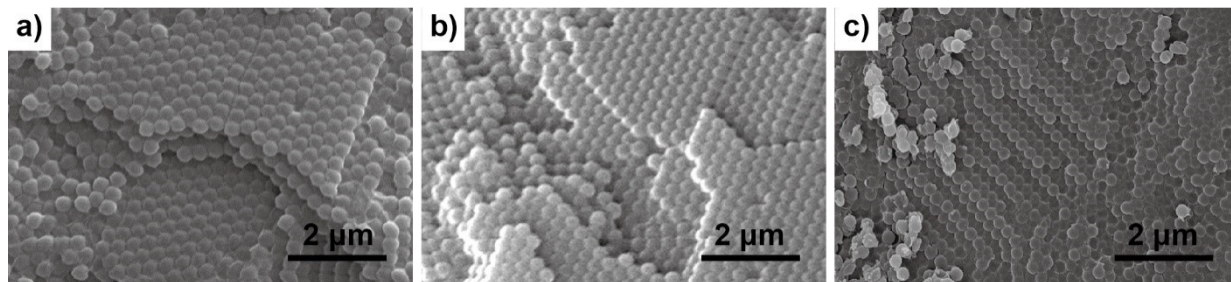

**Figure S8.** SEM images of PS@SiO<sub>2</sub> composite opal template films using different PS@SiO<sub>2</sub> core-shell spheres as building blocks with interstices between adjacent spheres filled with SiO<sub>2</sub>: (a) 352 nm; (b) 305 nm; (c) 268 nm.

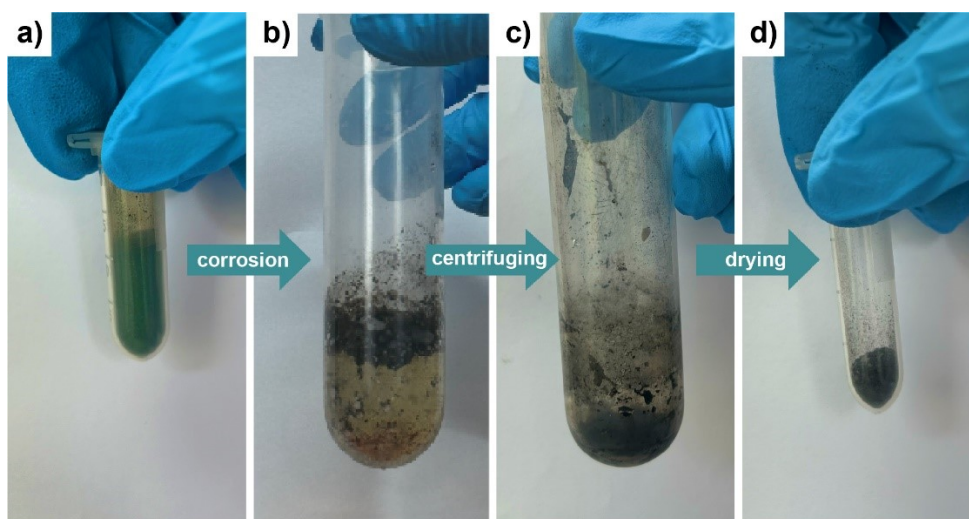

**Figure S9.** Digital photographs showing the whole harvesting process of carbon black

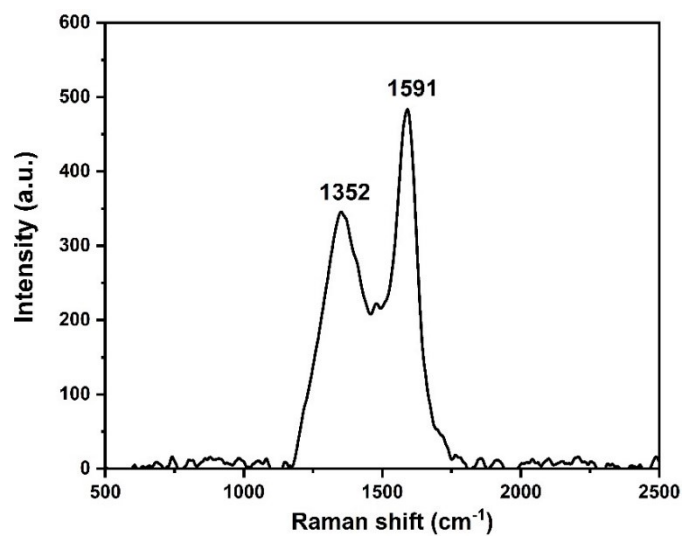

**Figure S10.** Raman spectrum of harvested products from etched green PC pigment powders

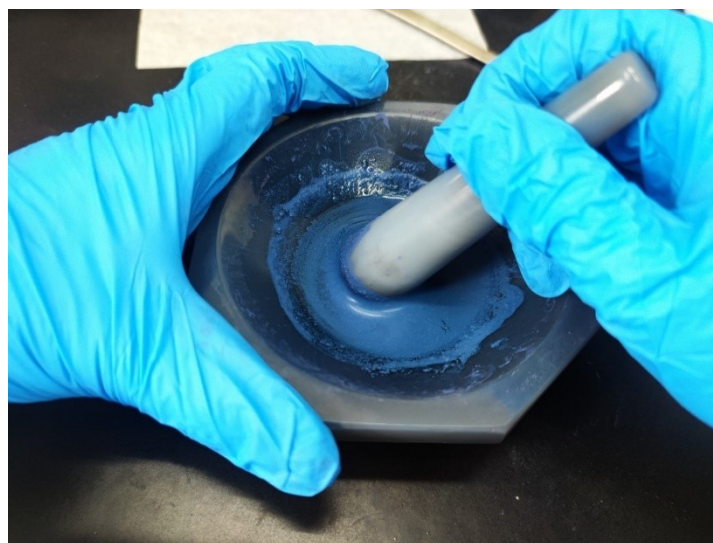

**Figure S11.** Digital photographs demonstrating the water grinding method

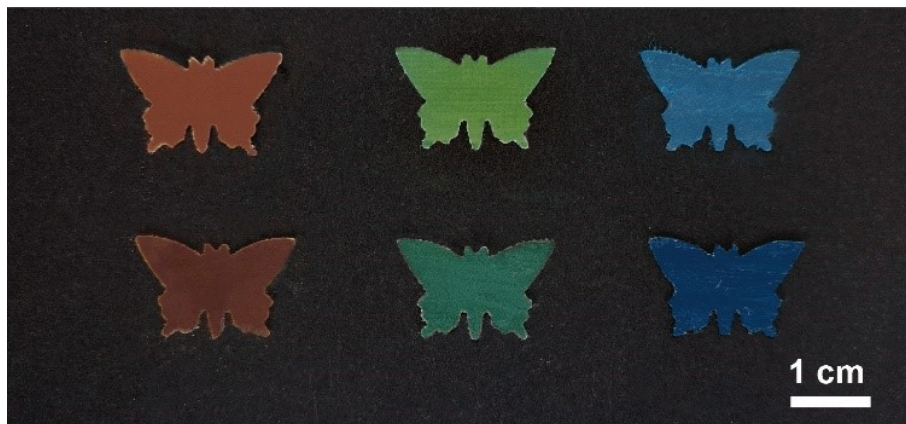

**Figure S12.** Digital photographs of butterfly patterns drawn with different PC pigments obtained at various calcination temperatures: the pigments for first row and second row are at 500 °C and 600 °C, respectively.

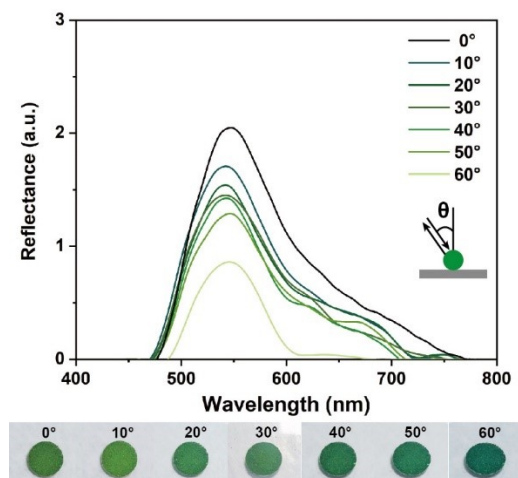

**Figure S13.** Reflectance spectra of green PC pigments at various incident and viewing angles

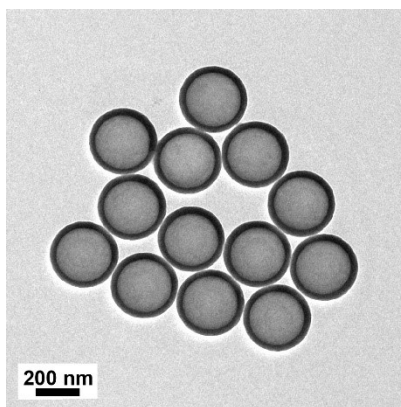

**Figure S14.** TEM image of calcined PS@SiO<sub>2</sub> spheres

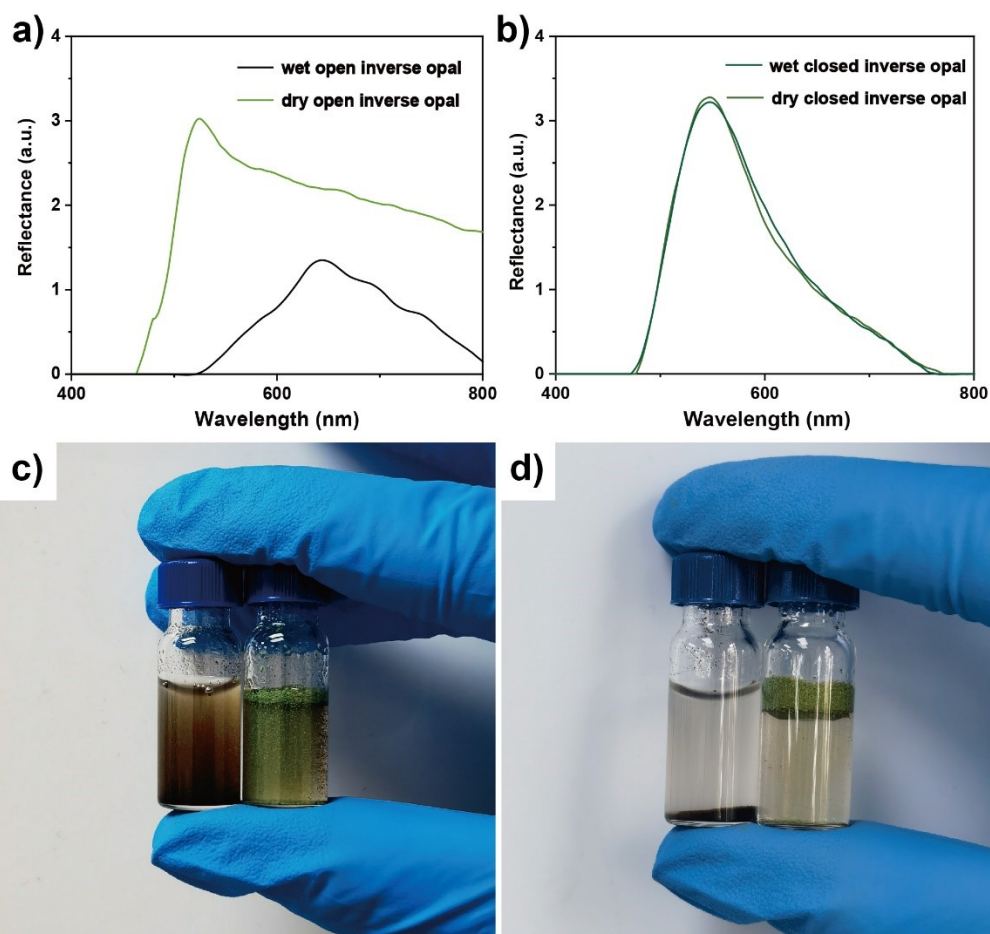

**Figure S15.** Reflectance spectra of SiO<sub>2</sub> PC pigments with different structures before and after immersion into water: (a) open-cell; (b) closed-cell structures; Digital photographs of SiO<sub>2</sub> inverse photonic crystals with through-hole and closed-hole structures after water infiltration: (c) right after shaking; (d) standing for 2 min



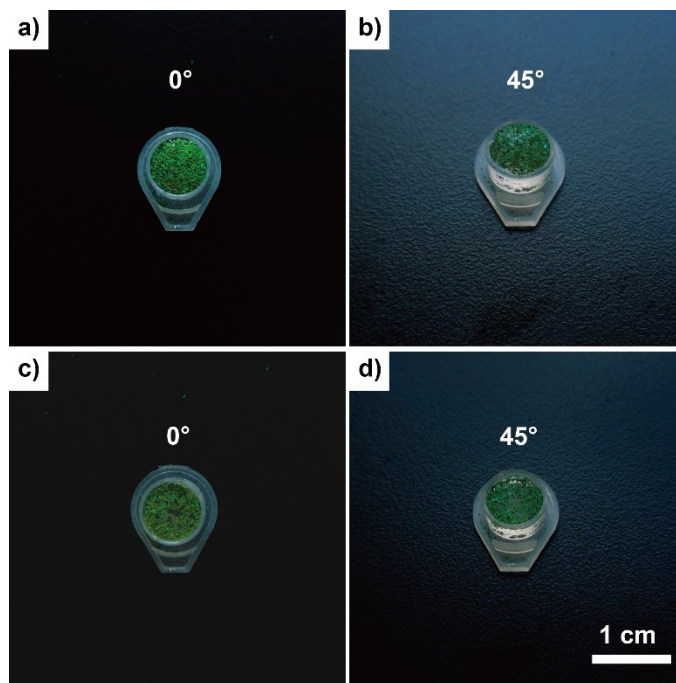

**Figure S16.** Digital photographs of SiO<sub>2</sub> closed-cell IOPC toner immersed into various solvents at different viewing angles: (a,b) water; (c,d) ethanol; (a,c) the viewing angle is 0°; (b,d) the viewing angle is 45°.
